# Supplementary material for: Using satellite imagery to estimate abundance of Cumberland Sound beluga whales (Delphinapterus leucas) in 2021
Source: Frontiers journal article supplement (doi:10.3389/fmars.2024.1422907), 2024-09-13
Supplement: Data_Sheet_2.xlsx [file Data_Sheet_2.xlsx]

## Sheet: Final Abundance (NC)
Survey Total
Stratum	Estimate (NC)	%CVNC	SE	CI lower	CI upper
CWF	199	5	9.95	182	218
KF	252	4	10.08	223	272
North	354	34	120.36	186	672
West	410	34	139.4	215	780
NE	411	47	193.17	171	987
SE	64	53	33.92	24	170
NC total	1690	15.9417	269.416	1241	2301

## Sheet: CWF
UNCORRECTED ESTIMATES
	Sat imagery
	Stratum		Estimate (Ns)	CVns
	CWF_Sept4	In plume	59	0
		Out plume	25	0
	CWF_Sept7	In plume	6	0
		Out plume	78	0
CORRECTED FOR AVAIL BIAS
			Correction factor (Ca)	CVca
	Availbility bias	in plume (0-1)	4.46	0.117
		out plum (0-2)	2.06	0.056
	Sat imagery
	Stratum		Corrected estimate (Nc)	CV	SE	Variance
	CWF_Sept4	In plume	263	0.117	30.771
		Out plume	52	0.056	2.912
		SUM	315	0.0981222	30.9085	955.334
	CWF_Sept7	In plume	27	0.117	3.159
		Out plume	161	0.056	9.016
		SUM	188	0.050816	9.5534	91.2675
ABUNDANCE ESTIMATE
	Sept4_est1	est1_SE	Sept7_est2	est2_SE
	315	30.9248	188	9.5534
	NC=	199.076
	Var=	83.3163		Var=(CV*estimate)^2
	SE=	9.12778		SE = SQRT (Var)
	CVnc=	0.0458506

## Sheet: KF
UNCORRECTED ESTIMATES
	Sat imagery
	Stratum		Estimate (Ns)	CVns
	Kangilo_Sept4	In plume	0	0
		Out plume	138	0
	Kangilo_Sept7	In plume	0	0
		Out plume	112	0
CORRECTED FOR AVAIL BIAS
			Correction factor (Ca)	CVca
	Availbility bias	in plume (0-1)	4.46	0.117
		out plum (0-2)	2.06	0.056
	Sat imagery
	Stratum		Corrected estimate (Nc)	CV	SE	Variance
	Kangilo_Sept4	In plume	0	0.117	0
		Out plume	284.28	0.056	15.9197
		SUM	284.28	0.056	15.9197	253.436
	Kangilo_Sept7	In plume	0	0.117	0
		Out plume	230.72	0.056	12.9203
		SUM	230.72	0.056	12.9203	166.935
ABUNDANCE ESTIMATE
	Sept4_est1	est1_SE	Sept7_est2	est2_SE
	284.28	15.9197	230.72	12.9203
	NC=	251.989
	Var=	100.643		Var=(CV*estimate)^2
	SE=	10.0321		SE = SQRT (Var)
	CVnc=	0.0398115

## Sheet: North
UNCORRECTED ESTIMATES
	Sat imagery
	Stratum		Estimate (Ns)	CVns
	North_Sept4	In plume	0	0
		Out plume	523	0.5275
	North_Sept7	In plume	0	0
		Out plume	186	0.5275
	North_Sept7	In plume	0	0
		Out plume	139	0.5275
CORRECTED FOR AVAIL BIAS
			Correction factor (Ca)	CVca
	Availbility bias	in plume (0-1)	4.46	0.117
		out plum (0-2)	2.06	0.056
	Sat imagery
	Stratum		Corrected estimate (Nc)	CV	SE	Variance
	North_Sept4	In plume	0	0.117	0
		Out plume	1077.38	0.530464	571.512
		SUM	1077.38	0.530464	571.512	326625
	North_Sept7	In plume	0	0.117	0
		Out plume	383.16	0.530464	203.253
		SUM	383.16	0.530464	203.253	41311.6
	North_Sept7	In plume	0	0.54032	0
		Out plume	286.34	0.530464	151.893
		SUM	286.34	0.530464	151.893	23071.5
ABUNDANCE ESTIMATE
	Sept4_est1	est1_SE	Sept7_est2	est2_SE	Sept7_est3	est3_SE
	1077.38	571.512	383.16	203.253	286.34	151.893
	NC=	353.829
	Var=	14162		Var=(CV*estimate)^2
	SE=	119.004		SE = SQRT (Var)
	CVnc=	0.336333
	CVns=	0.53

## Sheet: West
UNCORRECTED ESTIMATES
	Sat imagery
	Stratum		Estimate (Ns)	CVns
	West_Aug29	In plume	0	0
		Out plume	391	0.5251
	West_Aug30	In plume	0	0
		Out plume	344	0.5251
	West_Sept7	In plume	0	0
		Out plume	146	0.5251
CORRECTED FOR AVAIL BIAS
			Correction factor (Ca)	CVca
	Availbility bias	in plume (0-1)	4.46	0.117
		out plum (0-2)	2.06	0.056
	Sat imagery
	Stratum		Corrected estimate (Nc)	CV	SE	Variance
	West_Aug29	In plume	0	0.117	0
		Out plume	805.46	0.528078	425.345
		SUM	805.46	0.528078	425.345	180919
	West_Aug30	In plume	0	0.117	0
		Out plume	708.64	0.528078	374.217
		SUM	708.64	0.528078	374.217	140038
	West_Sept7	In plume	0	0.537977	0
		Out plume	300.76	0.528078	158.825
		SUM	300.76	0.528078	158.825	25225.3
ABUNDANCE ESTIMATE
	Aug29_est1	est1_SE	Aug30_est2	est2_SE	Sept7_est3	est3_SE
	805.46	425.345	708.64	374.217	300.76	158.825
	NC=	409.767
	var=	19116.4		Var=(CV*estimate)^2
	SE=	138.262		SE = SQRT (Var)
	CVnc=	0.337416
	CVns=	0.53

## Sheet: NE
UNCORRECTED ESTIMATES
	Sat imagery
	Stratum		Estimate (Ns)	CVns
	Northeast_Aug30	In plume	0	0
		Out plume	1318	0.5263
	Northeast_Sept7	In plume	0	0
		Out plume	179	0.5263
CORRECTED FOR AVAIL BIAS
			Correction factor (Ca)	CVca
	Availbility bias	in plume (0-1)	4.46	0.117
		out plum (0-2)	2.06	0.056
	Sat imagery
	Stratum		Estimate (Nc)	CV	SE	Variance
	Northeast_Aug30	In plume	0	0.117	0
		Out plume	2715.08	0.529271	1437.01
		SUM	2715.08	0.529271	1437.01	2.06501e+06
	Northeast_Sept7	In plume	0	0.117	0
		Out plume	368.74	0.529271	195.163
		SUM	368.74	0.529271	195.163	38088.7
ABUNDANCE ESTIMATE
	Aug30_est1	est1_SE	Sept7_est2	est2_SE
	2715.08	1437.01	368.74	195.163
	NC=	411.234
	var=	37398.9		Var=(CV*estimate)^2
	SE=	193.388		SE = SQRT (Var)
	CVnc=	0.470263
	CVns=	0.53

## Sheet: SE
UNCORRECTED ESTIMATES
	Sat imagery
	Stratum		Estimate (Ns)	CVns
	SE_Aug29	In plume	0	0
		Out plume	31	0.5263
CORRECTED FOR AVAIL BIAS
			Correction factor (Ca)	CVca
	Availbility bias	in plume (0-1)	4.46	0.117
		out plum (0-2)	2.06	0.056
	Sat imagery
	Stratum		Estimate (Nc)	CV	SE	Variance
	SE_Aug29	In plume	0	0.117	0
		Out plume	63.86	0.529271	33.7992
		SUM	63.86	0.529271	33.7992	1142.39
ABUNDANCE ESTIMATE
		Aug29_est1	est1_SE
		64	33.9
		NC=	64
		var=	1142.39		Var=(CV*estimate)^2
		SE=	33.8733		SE = SQRT (Var)
		CVnc=	0.529271
		CVns=	0.53
